# Supplementary material for: A multifunctional PAN/PVP nanofiber sponge wound dressing loaded with ZIF-8-derived carbon nanoparticles with adjustable wetness for rapid wound disinfection and exudate management
Source: Royal Society of Chemistry journal article supplement (doi:10.1039/d3tb01119d), 2023-01-01
Supplement: d3tb01119d1.pdf [file d3tb01119d1.pdf]

# **A multifunctional PAN/PVP nanofiber sponge wound dressing loaded with ZIF-8 derived carbon nanoparticles with adjustable wetness for rapid wound disinfection and exudate management**

Zhipeng Yuan\*, Jing Zhang, Xinfu Zhao, Sijia Liu, Shimo Yu, Xiaochan Liu, Xinen Zhang, Xibin Yi\*

*Shandong Key Laboratory for Special Silicon-containing Material, Advanced Materials Institute, Qilu University of Technology (Shandong Academy of Sciences), Jinan, 250014, P. R. China*

\* for corresponding author.

*E-mail address: yuanzp@sdas.org; yixb@sdas.org*

## **S1. Thermogravimetric testing of ZnO@CNP-NFS**

The thermal stability of ZnO@CNP-NFS is tested by TG-DSC (Mettler TGA/DSC3+). The test is conducted in an air atmosphere, with a range of room temperature to 800°C.

## **S2. Test method for Zn<sup>2+</sup> release behavior of ZnO@CNP-NFS.**

To test the Zn<sup>2+</sup> release behavior of ZnO@CNP-NFS, a 2g ZnO@CNP-NFS was weighed and soaked in 6ml of PBS. The sponge was taken out daily and the Zn<sup>2+</sup> concentration in the PBS was measured. Then the ZnO@CNP-NFS was squeezed dry and re placed in fresh PBS. This operation was repeated for ten consecutive days. The Zn<sup>2+</sup> concentration in PBS was tested by ICP-OES (Varian 720).

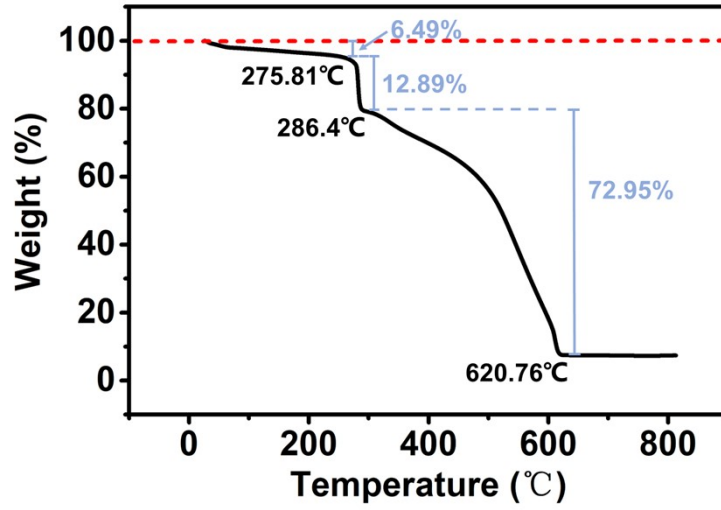

Figure S1 TG analysis of ZnO@CNP-NFS

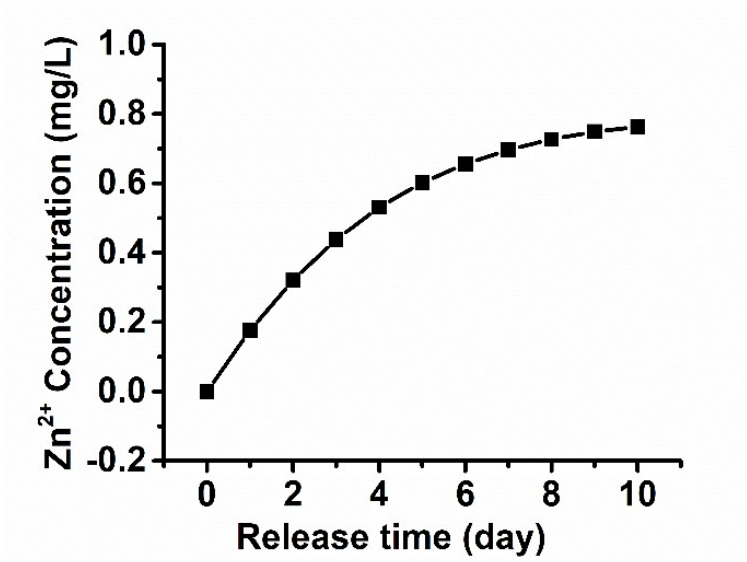

Figure S2 Zn<sup>2+</sup> release curve of ZnO@CNP-NFS in PBS.

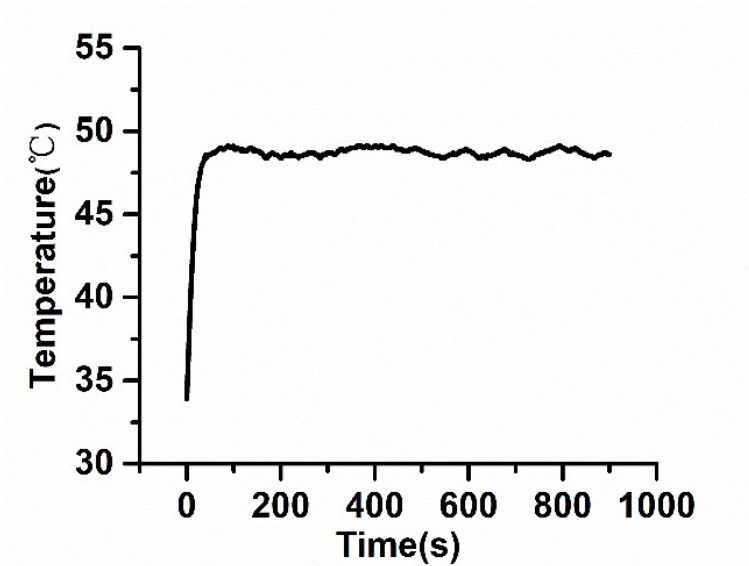

Figure S3 The photothermal heating curves of ZnO@CNP-NFS irradiated by 808nm NIR laser ( $1 \text{ W} \cdot \text{cm}^{-2}$ ) during PTT treatment in vivo.
